# Supplementary material for: Two Retrotransposon Elements in Intron of Porcine BMPR1B Is Associated with Phenotypic Variation
Source: MDPI journal article supplement (doi:10.3390/life12101650), 2022-10-20
Supplement: s1 [file s1]

# Supplementary material of Two Retrotransposon Elements in Intron of Porcine *BMPR1B* Is Associated with Phenotypic Variation

**Table S1:** Number and origin of pig breeds for *BMPR1B* RIPs detection

| Breed             | Number | Province/country of origin |
|-------------------|--------|----------------------------|
| Large white       | 556    | Anhui/China                |
| Duroc             | 24     | Anhui/China                |
| Landrace          | 24     | Anhui/China                |
| Sujiang           | 21     | Jiangsu/China              |
| Sushan            | 32     | Jiangsu/China              |
| Fengjing          | 24     | Jiangsu/China              |
| Meishan           | 24     | Jiangsu/China              |
| Erhualian         | 24     | Jiangsu/China              |
| Wuzhishan         | 24     | Hainan/China               |
| Bama              | 6      | Jiangsu/China              |
| Diannan small-ear | 6      | Yunnan/China               |
| Tibetan           | 6      | Jiangsu/China              |
| Wild boars        | 6      | Anhui/China                |

**Table S2:** The primers for PCR, vectors construction and q-PCR

| Primer name               | Forward primer                       | Reverse primer                            | Purpose                |
|---------------------------|--------------------------------------|-------------------------------------------|------------------------|
| <i>BMPR1B</i> -SINE-RIP1  | F: TCCATCTCAGCCATAGCAAC              | R: GTGCGCTCATTTATAAGGCAT                  | RIPs<br>identification |
| <i>BMPR1B</i> -SINE-RIP2  | F: AACAGATGGCTCCTATCATCC             | R: ATTCCTTCCTATGACCCGTTT                  |                        |
| <i>BMPR1B</i> -SINE-RIP3  | F: AAGAAGCCCAGGAGATCCAA              | R: CCTCAGGCTCATTGTGTCGAA                  |                        |
| <i>BMPR1B</i> -SINE-RIP4  | F: GAACATACAGCTCCAGTGACC             | R: GCTGCTATTCTTCAGATACGTT                 |                        |
| <i>BMPR1B</i> -SINE-RIP5  | F: GTCCTTTACAGAATTGCCAT              | R: AACTGCAGCTGTGAACCTCA                   |                        |
|                           | F:                                   | R:                                        |                        |
| <i>BMPR1B</i> -SINE-RIP6  | CCTAATTCGCAAAGATTTTCATAACA           | AAAATGATCTGTGCTTATTGTAGAGG                |                        |
|                           | CT                                   | T                                         |                        |
| <i>BMPR1B</i> -SINE-RIP7  | F: CTGAGCCTAGAACTTTAACCC             | R: TTCTTCATTCCCACGTAGCTT                  |                        |
| <i>BMPR1B</i> -ERV-RIP8   | F: TGTGTAAAACTATTGACCCTC             | R: GCACATATTACATGCTAAGGGA                 |                        |
| <i>BMPR1B</i> -SINE-RIP9  | F: TCAATGAAACAAGATGGCACT             | R: ATCGGCTATATCATGAACCCCT                 |                        |
| <i>BMPR1B</i> -SINE-RIP10 | F: CCTAGATATTGAACGACCATGC            | R: TGCCATTTTACTGACTTGGTG                  |                        |
| <i>BMPR1B</i> -LINE-RIP11 | F: CCTGACCCTCTTTCATTACACC            | R: AGTTCCTGTGCTCTTAACACC                  |                        |
| <i>BMPR1B</i> -ERV-RIP12  | F: ACTTTCATTCAATTACAAAGGCTA          | R: TCTGAGCGTTGTAACATGACA                  |                        |
| <i>BMPR1B</i> -LINE-RIP13 | F: ACCTCACATTAAGAGCCGAGA             | R: AATTTCCATGTACTGCGAGTG                  |                        |
| <i>BMPR1B</i> -RIP9       | CgacgcgtcgCTTTTGTGTTGTTGTT<br>GTTGCT | CggaattccgGAGGAGTATTGGGAGT<br>TCCCA       | vectors                |
| <i>BMPR1B</i> -RIP13      | CgacgcgtcgAGCTCTCACACATGCT<br>ATGT   | CggaattccgAAACTGCTCAGTATACC<br>TTAGAAATCT | construction           |
| <i>GAPDH</i>              | ATCTTCCAGGAGCGAGATCCC                | ATGGTTCACGCCCATCACAA                      | q-PCR                  |
| <i>BMPR1B</i>             | TACCACCCAACACCCGAGT                  | ACGCATCTCCTAGCAACCTC                      |                        |
